# Supplementary material for: Germination and Seedling Growth of Water Primroses: A Cross Experiment between Two Invaded Ranges with Contrasting Climates
Source: PubMed Central journal article supplement (PMC5623178; doi:10.3389/fpls.2017.01677), 2017-09-26
Supplement: Data_Sheet_1.pdf [file Data_Sheet_1.pdf]

# Germination and seedling growth of water primroses: a cross experiment between two invaded ranges with contrasting climates

Supplementary Material

Morgane Gillard, Brenda J. Grewell, Caryn J. Futrell, Carole Deleu, Gabrielle Thiébaud\*

\*Correspondence: Corresponding Author: [gabrielle.thiebaud@univ-rennes1.fr](mailto:gabrielle.thiebaud@univ-rennes1.fr)

## Supplementary material 1 - Contrasting climate between the two invasive ranges: a Mediterranean-type climate and an Oceanic climate

**Figure S1.** Climatic diagrams of Davis in California, USA (A) and Rennes in France (B), representing the local climate (Mediterranean-type climate and Oceanic climate, respectively). Light blue bars represent the monthly rainfall in mm, the lines depict the average high (in red) and low (in blue) temperature per month, in Celsius degree (data Source: Météo-France and USclimatedata.com).

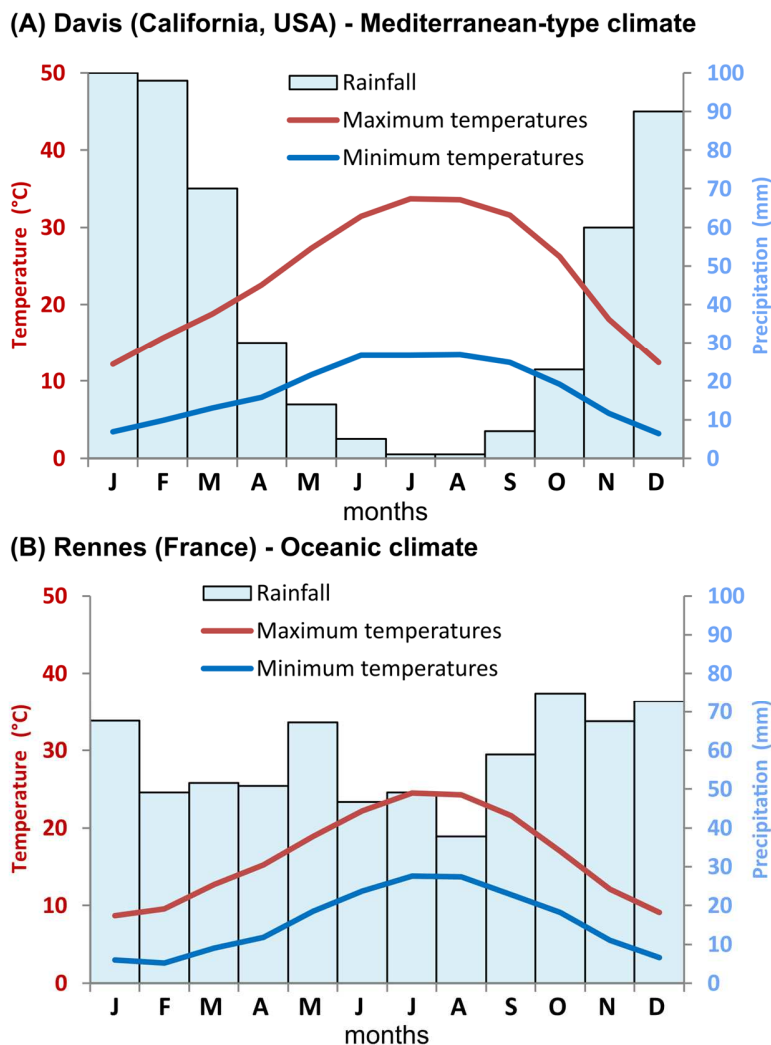

**Supplementary material 2 – Proportion of variability of models explained****Table S1.** Proportion of the variability explained by fixed effects (climate, range and species) and random effects (population) of the linear models applied to mean time to germination data.

|                               | <b>Mean time to germination</b> |
|-------------------------------|---------------------------------|
| <b>Fixed effects</b>          | <b>74.8%</b>                    |
| <b>Random effects</b>         | <b>0%</b>                       |
| <b>Fixed + random effects</b> | <b>74.8%</b>                    |

**Table S2.** Proportion of the variability explained by fixed effects (climate, range and species) and random effects (population) of the generalized linear models for binomial data.

|                               | <b>Seed germination</b> | <b>Seedling survivorship</b> | <b>Embryo viability</b> |
|-------------------------------|-------------------------|------------------------------|-------------------------|
| <b>Fixed effects</b>          | <b>17.7%</b>            | <b>44.8%</b>                 | <b>18.1%</b>            |
| <b>Random effects</b>         | <b>1.4%</b>             | <b>0</b>                     | <b>1.4%</b>             |
| <b>Fixed + random effects</b> | <b>19.1%</b>            | <b>44.8%</b>                 | <b>19.5%</b>            |

**Table S3.** Proportion of the variability explained by fixed effects (seedling age, climate, range and species) and random effects (tank, capsule and population) of the models for seedling characteristics.

|                               | <b>Shoot length</b> | <b>Root length</b> | <b>Shoot weight</b> | <b>Root weight</b> | <b>Number of branches</b> |
|-------------------------------|---------------------|--------------------|---------------------|--------------------|---------------------------|
| <b>Fixed effects</b>          | <b>47%</b>          | <b>52%</b>         | <b>59%</b>          | <b>55%</b>         | <b>38%</b>                |
| <b>Random effects</b>         | <b>16%</b>          | <b>9%</b>          | <b>14%</b>          | <b>13%</b>         | <b>8%</b>                 |
| <b>Fixed + random effects</b> | <b>63%</b>          | <b>61%</b>         | <b>73%</b>          | <b>68%</b>         | <b>46%</b>                |

Supplementary material 3 – Model results on seedling characteristics

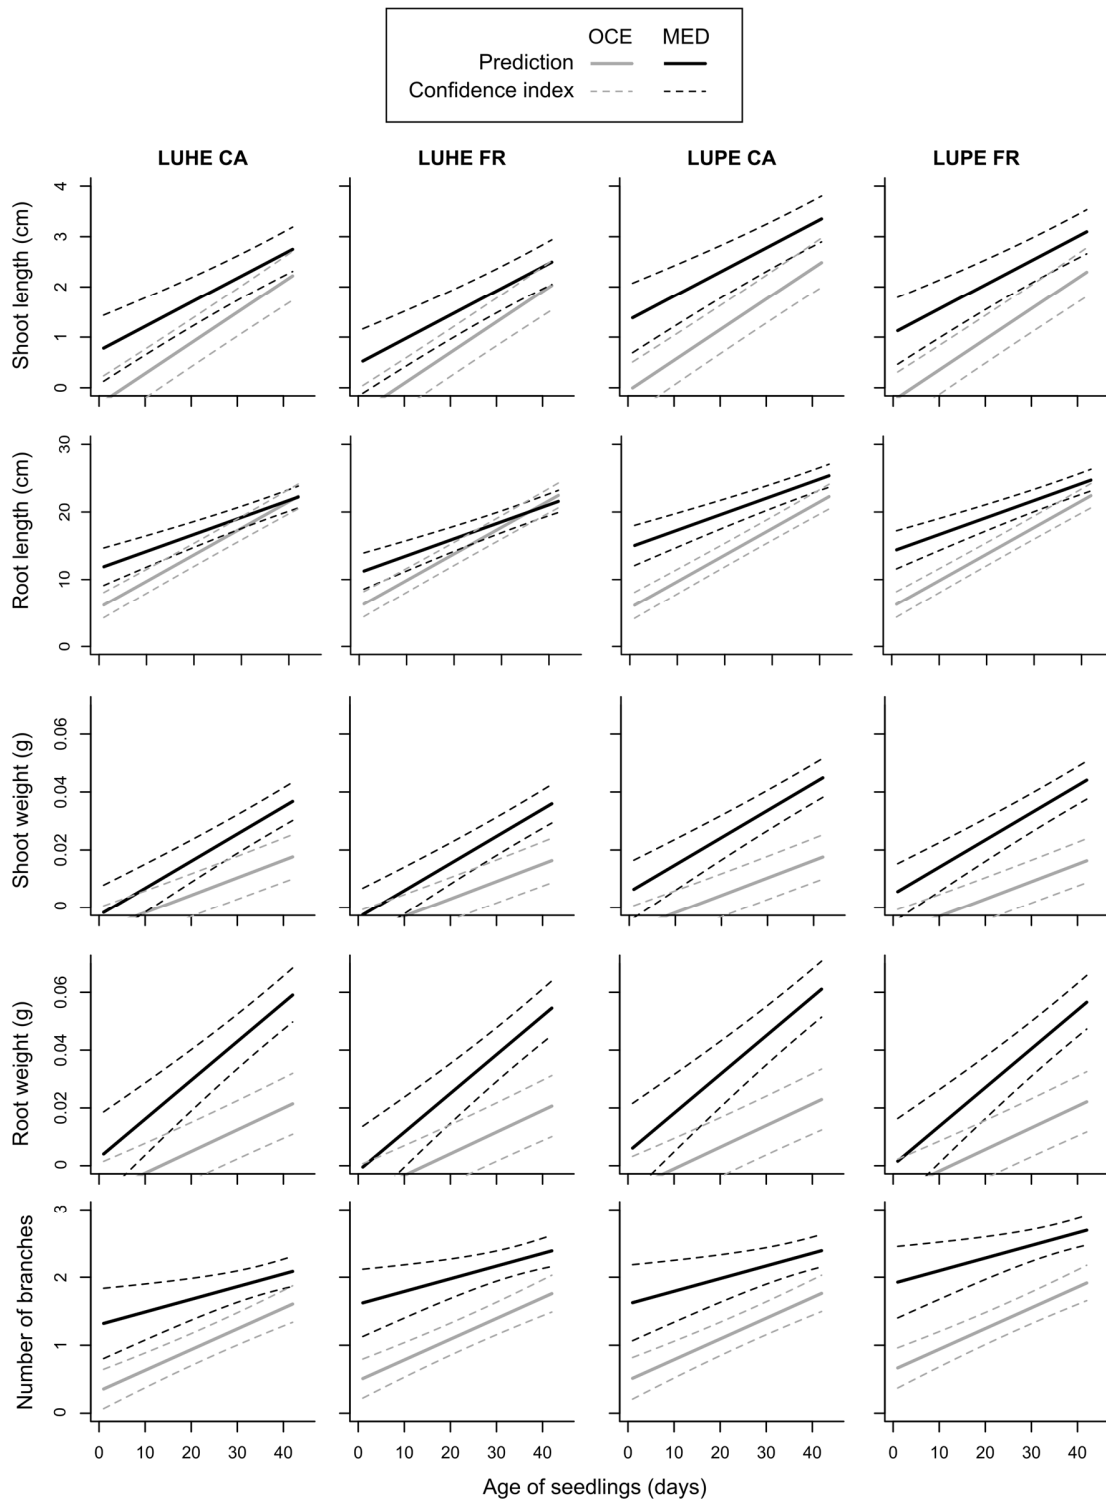

**Figure S2.** Predictions from linear models with mixed effects of seedling characteristics, depending on their age, for *Ludwigia hexapetala* and *Ludwigia peploides* subsp. *montevidensis* from two invasive range and exposed to two contrasting climates (OCE=Oceanic climate, MED=Mediterranean-type climate).

**Supplementary material 3 – Model results for seedling characteristics****Table S4.** Calculation of total seedling biomass produced under the two climates (MED= Mediterranean-type climate, OCE= Ocean climate).

| Population | Climate | % germination | x % survivor-ship | x Mean total dry biomass per seedling (g) | /100 = | Total biomass produced (g) | Ratio MED/OCE  |
|------------|---------|---------------|-------------------|-------------------------------------------|--------|----------------------------|----------------|
| CALH1      | MED     | 56.6          | 79.9              | 0.090                                     |        | 4.07                       | 13.7           |
|            | OCE     | 30.0          | 99.3              | 0.010                                     |        | 0.30                       |                |
| CALH2      | MED     | 64.2          | 74.3              | 0.075                                     |        | 3.58                       | 4.2            |
|            | OCE     | 47.7          | 99.3              | 0.018                                     |        | 0.85                       |                |
| FRLH1      | MED     | 53.5          | 81.6              | 0.089                                     |        | 3.89                       | 11.4           |
|            | OCE     | 31.0          | 100               | 0.011                                     |        | 0.34                       |                |
| FRLH2      | MED     | 48.3          | 83.0              | 0.076                                     |        | 3.05                       | 5.8            |
|            | OCE     | 40.3          | 100               | 0.013                                     |        | 0.52                       |                |
| CALP1      | MED     | 13.5          | 54.8              | 0.123                                     |        | 0.91                       | 2.3            |
|            | OCE     | 23.1          | 99.0              | 0.017                                     |        | 0.39                       |                |
| CALP2      | MED     | 20.1          | 83.7              | 0.109                                     |        | 1.83                       | 4.7            |
|            | OCE     | 17.9          | 99.3              | 0.022                                     |        | 0.39                       |                |
| FRLP1      | MED     | 67.4          | 66.0              | 0.095                                     |        | 4.23                       | 7.1            |
|            | OCE     | 40.5          | 98.3              | 0.015                                     |        | 0.60                       |                |
| FRLP2      | MED     | 83.0          | 60.4              | 0.082                                     |        | 4.11                       | 4.2            |
|            | OCE     | 58.5          | 98.6              | 0.017                                     |        | 0.98                       |                |
|            |         |               |                   |                                           |        |                            | Average<br>6.7 |
